# Supplementary material for: CMG-Biotools, a Free Workbench for Basic Comparative Microbial Genomics
Source: PubMed Central journal article supplement (PMC3618517; doi:10.1371/journal.pone.0060120), 2013-04-05

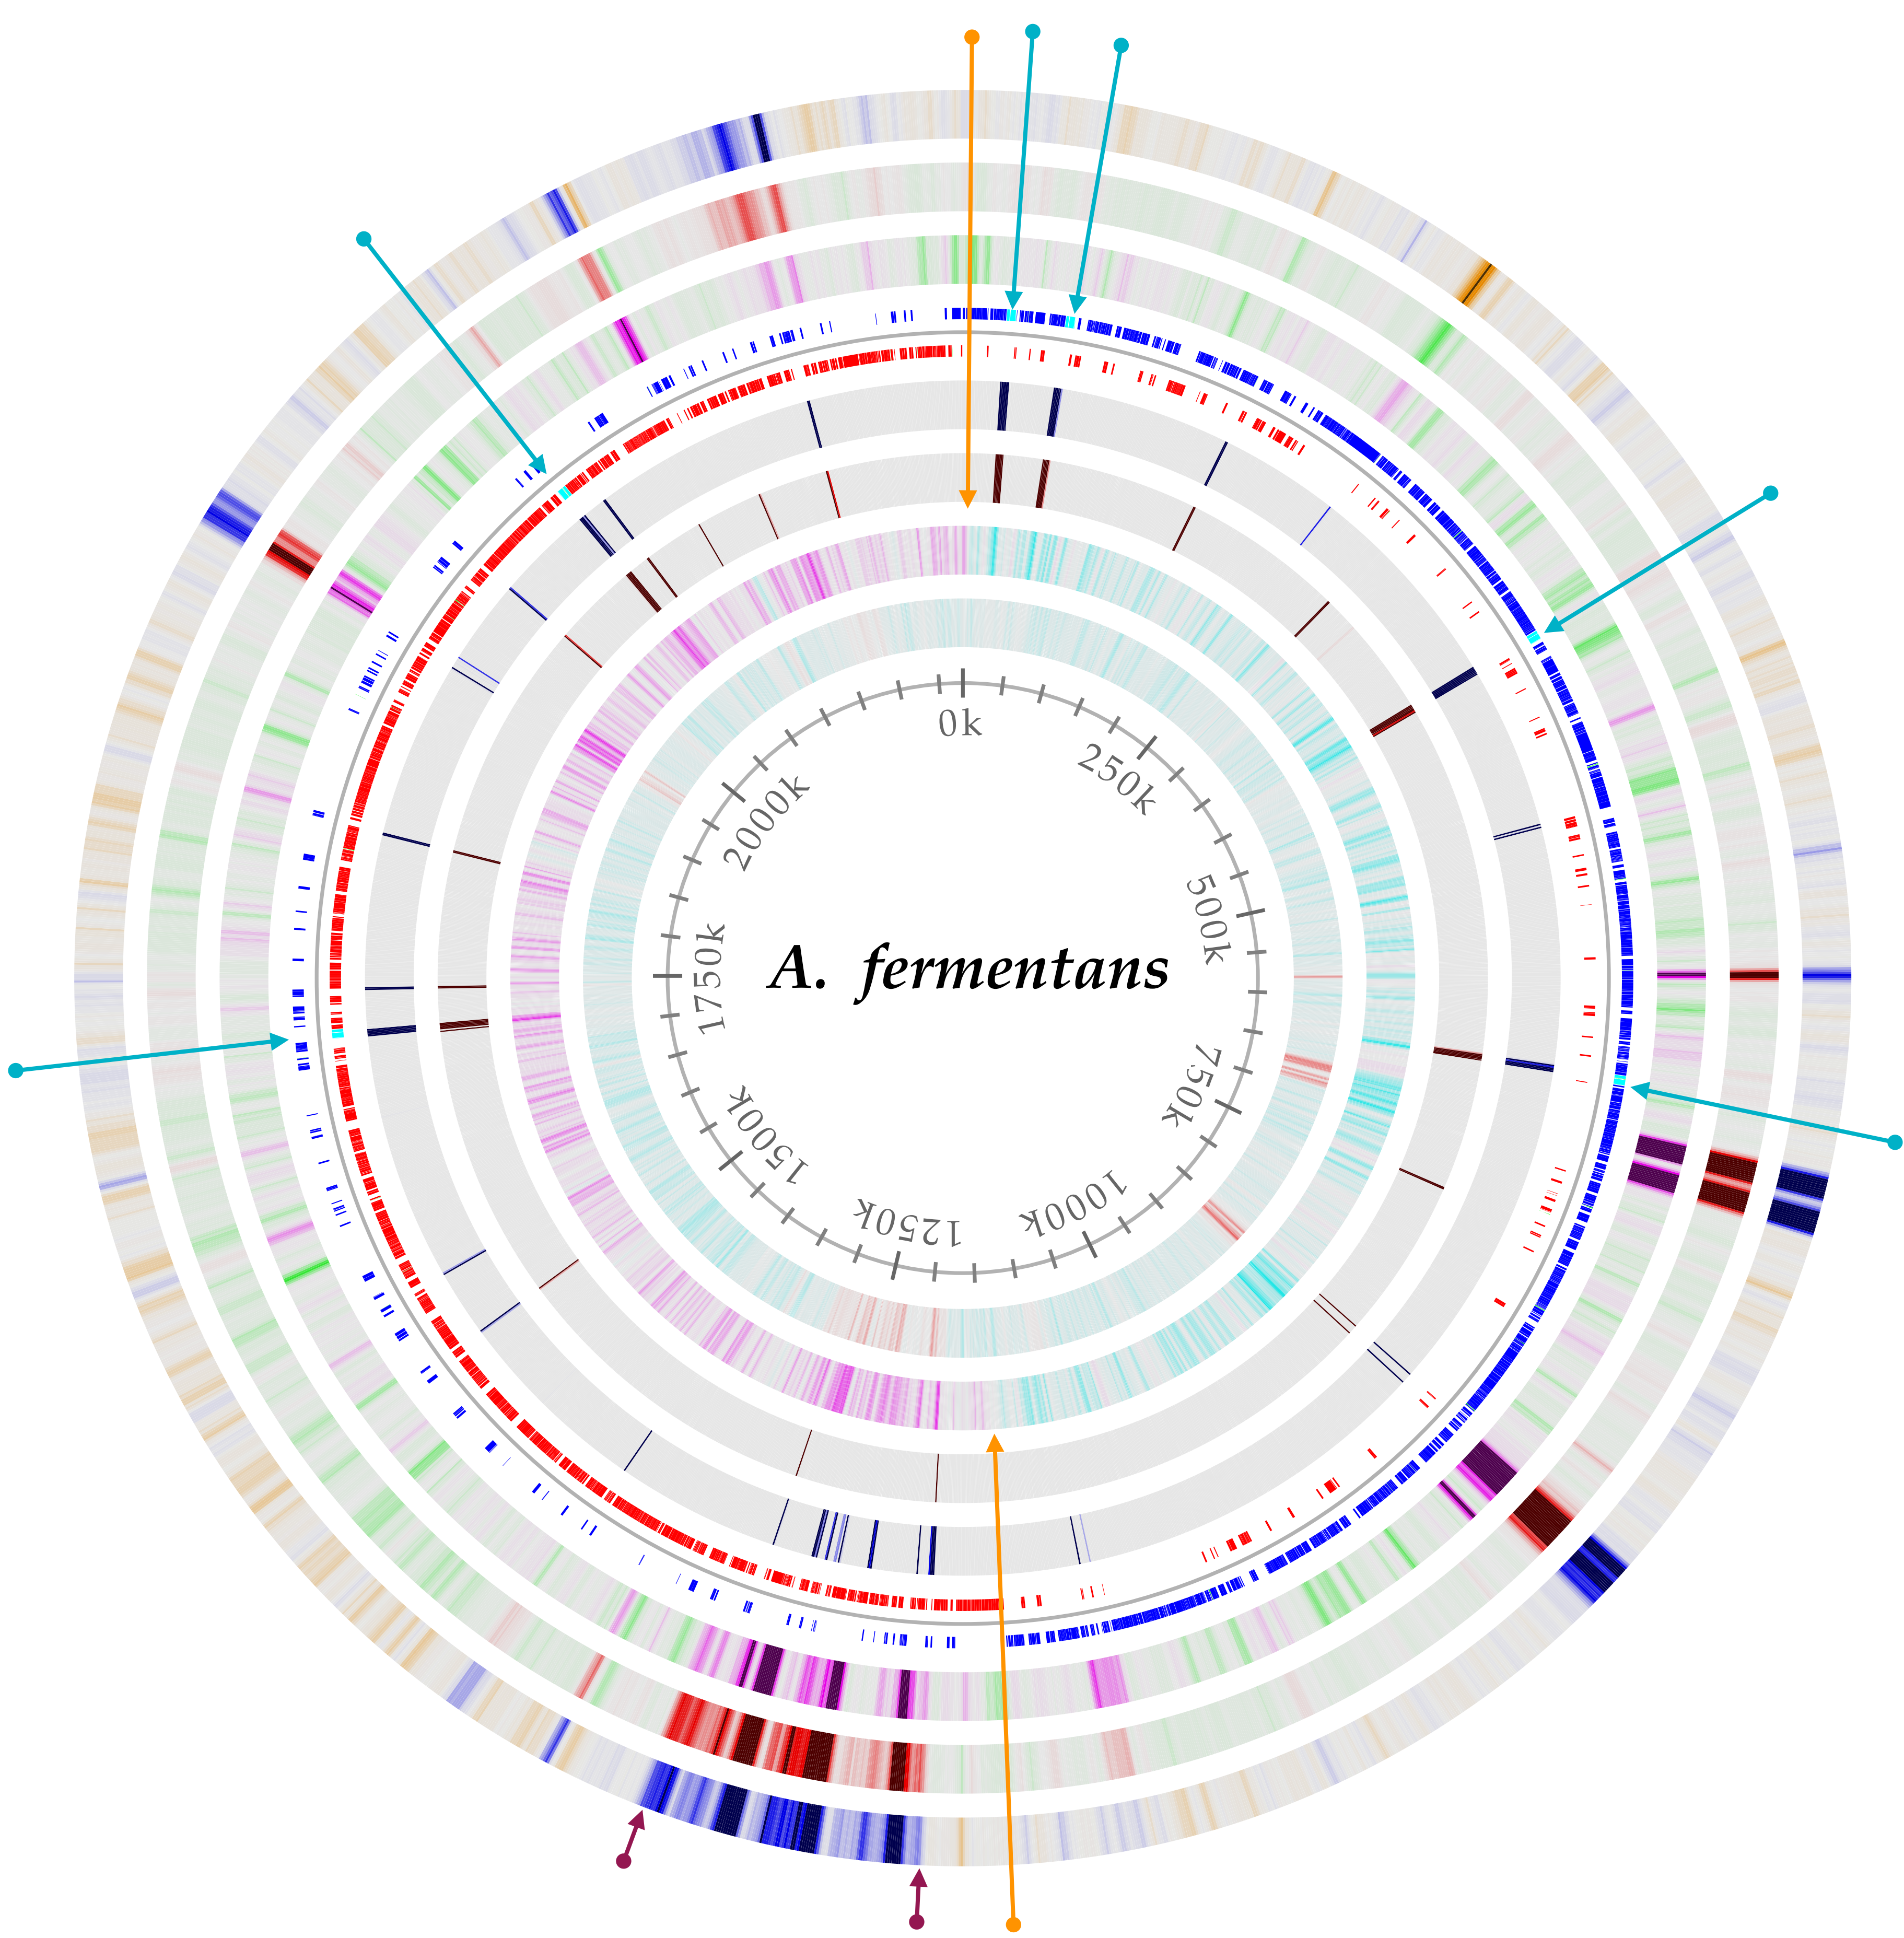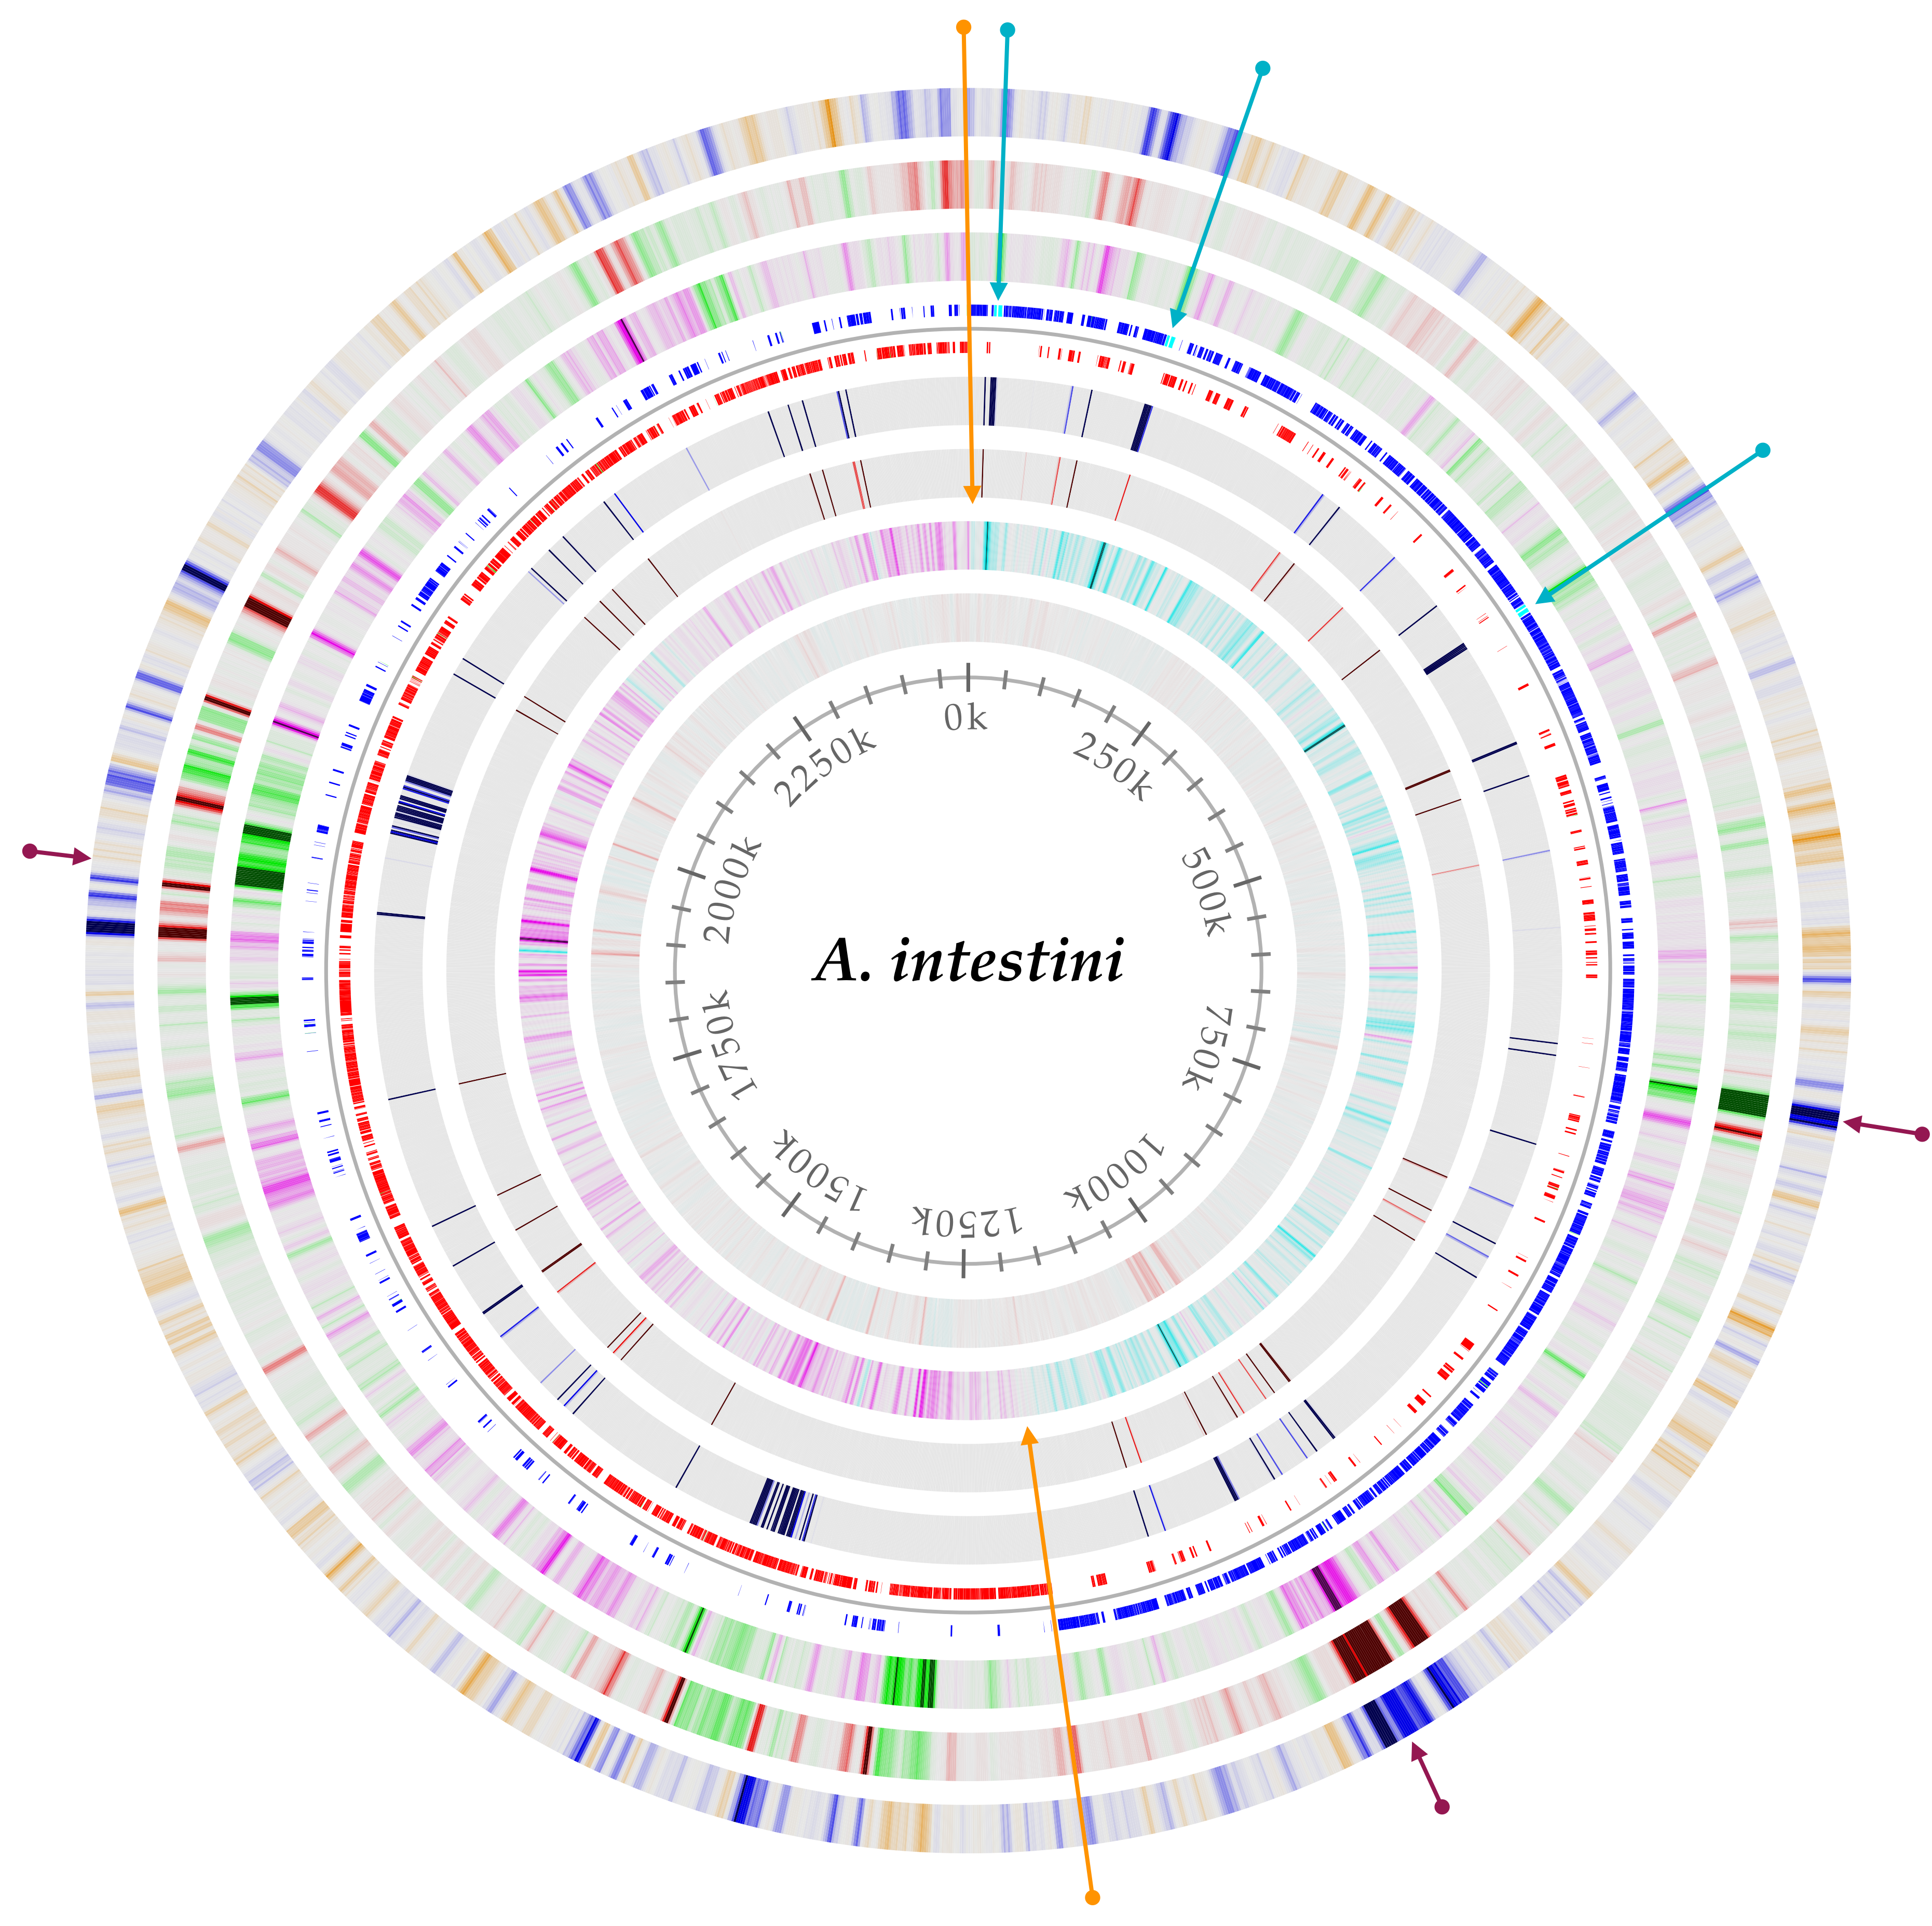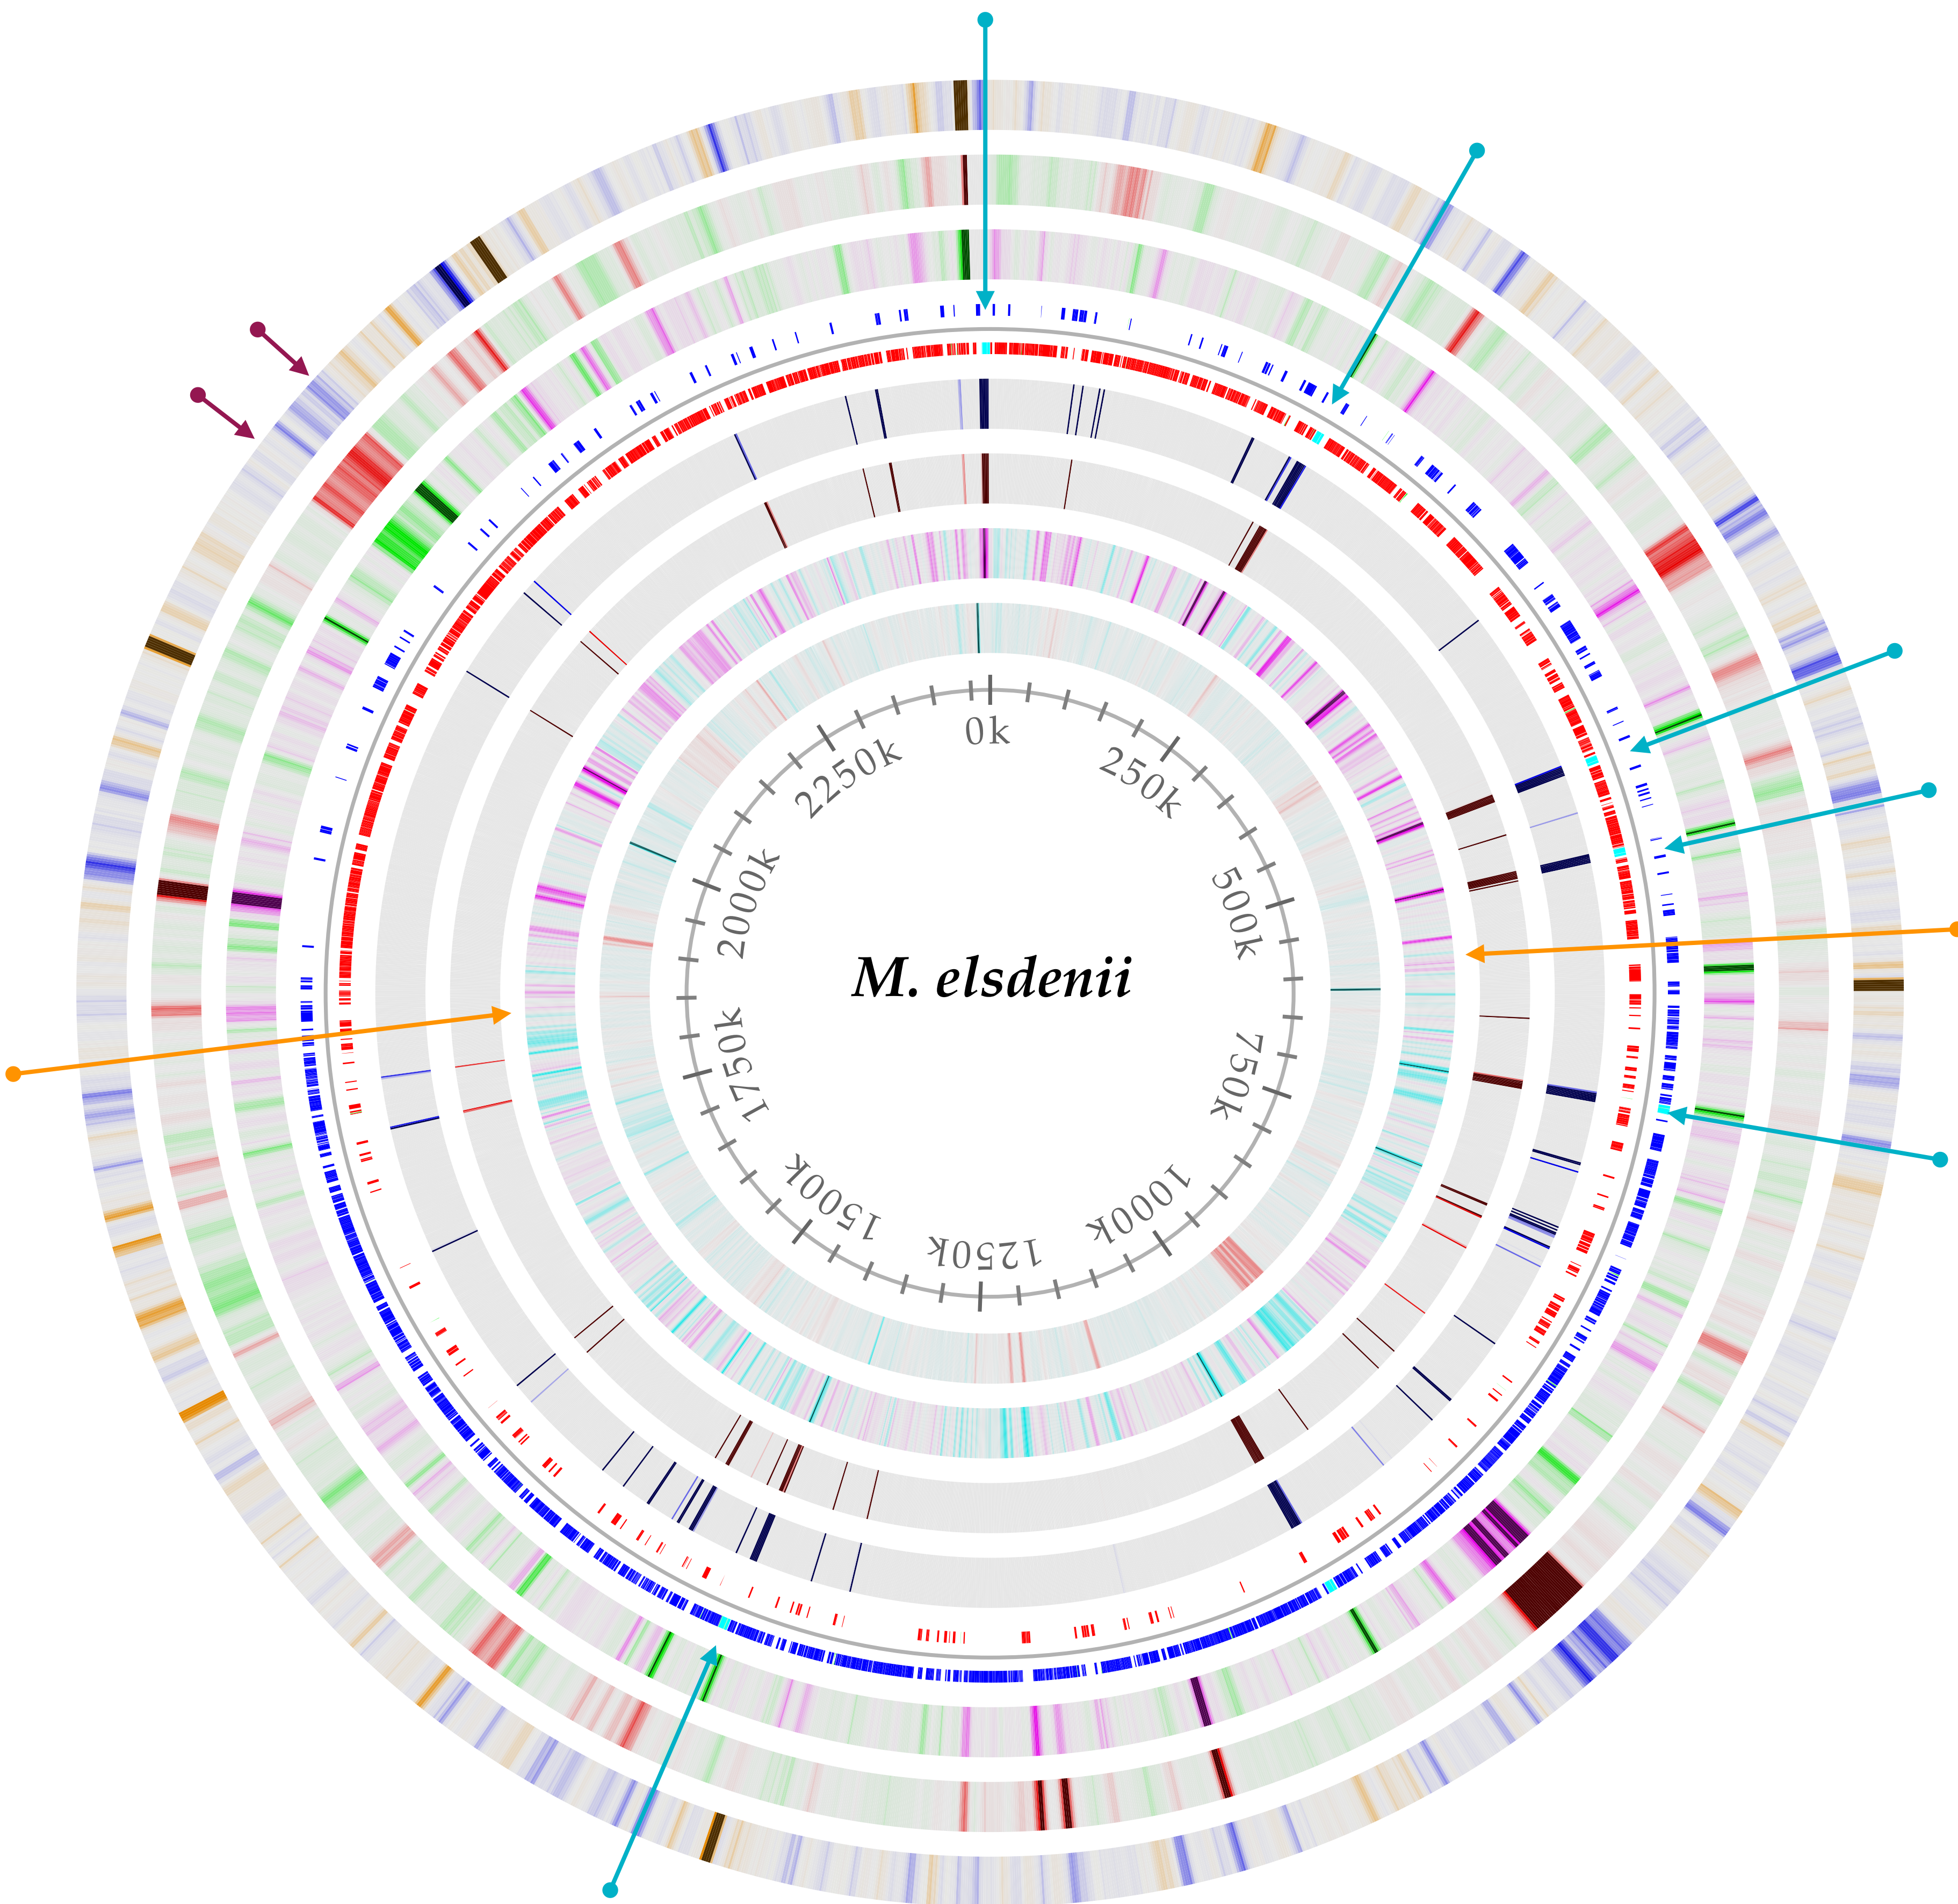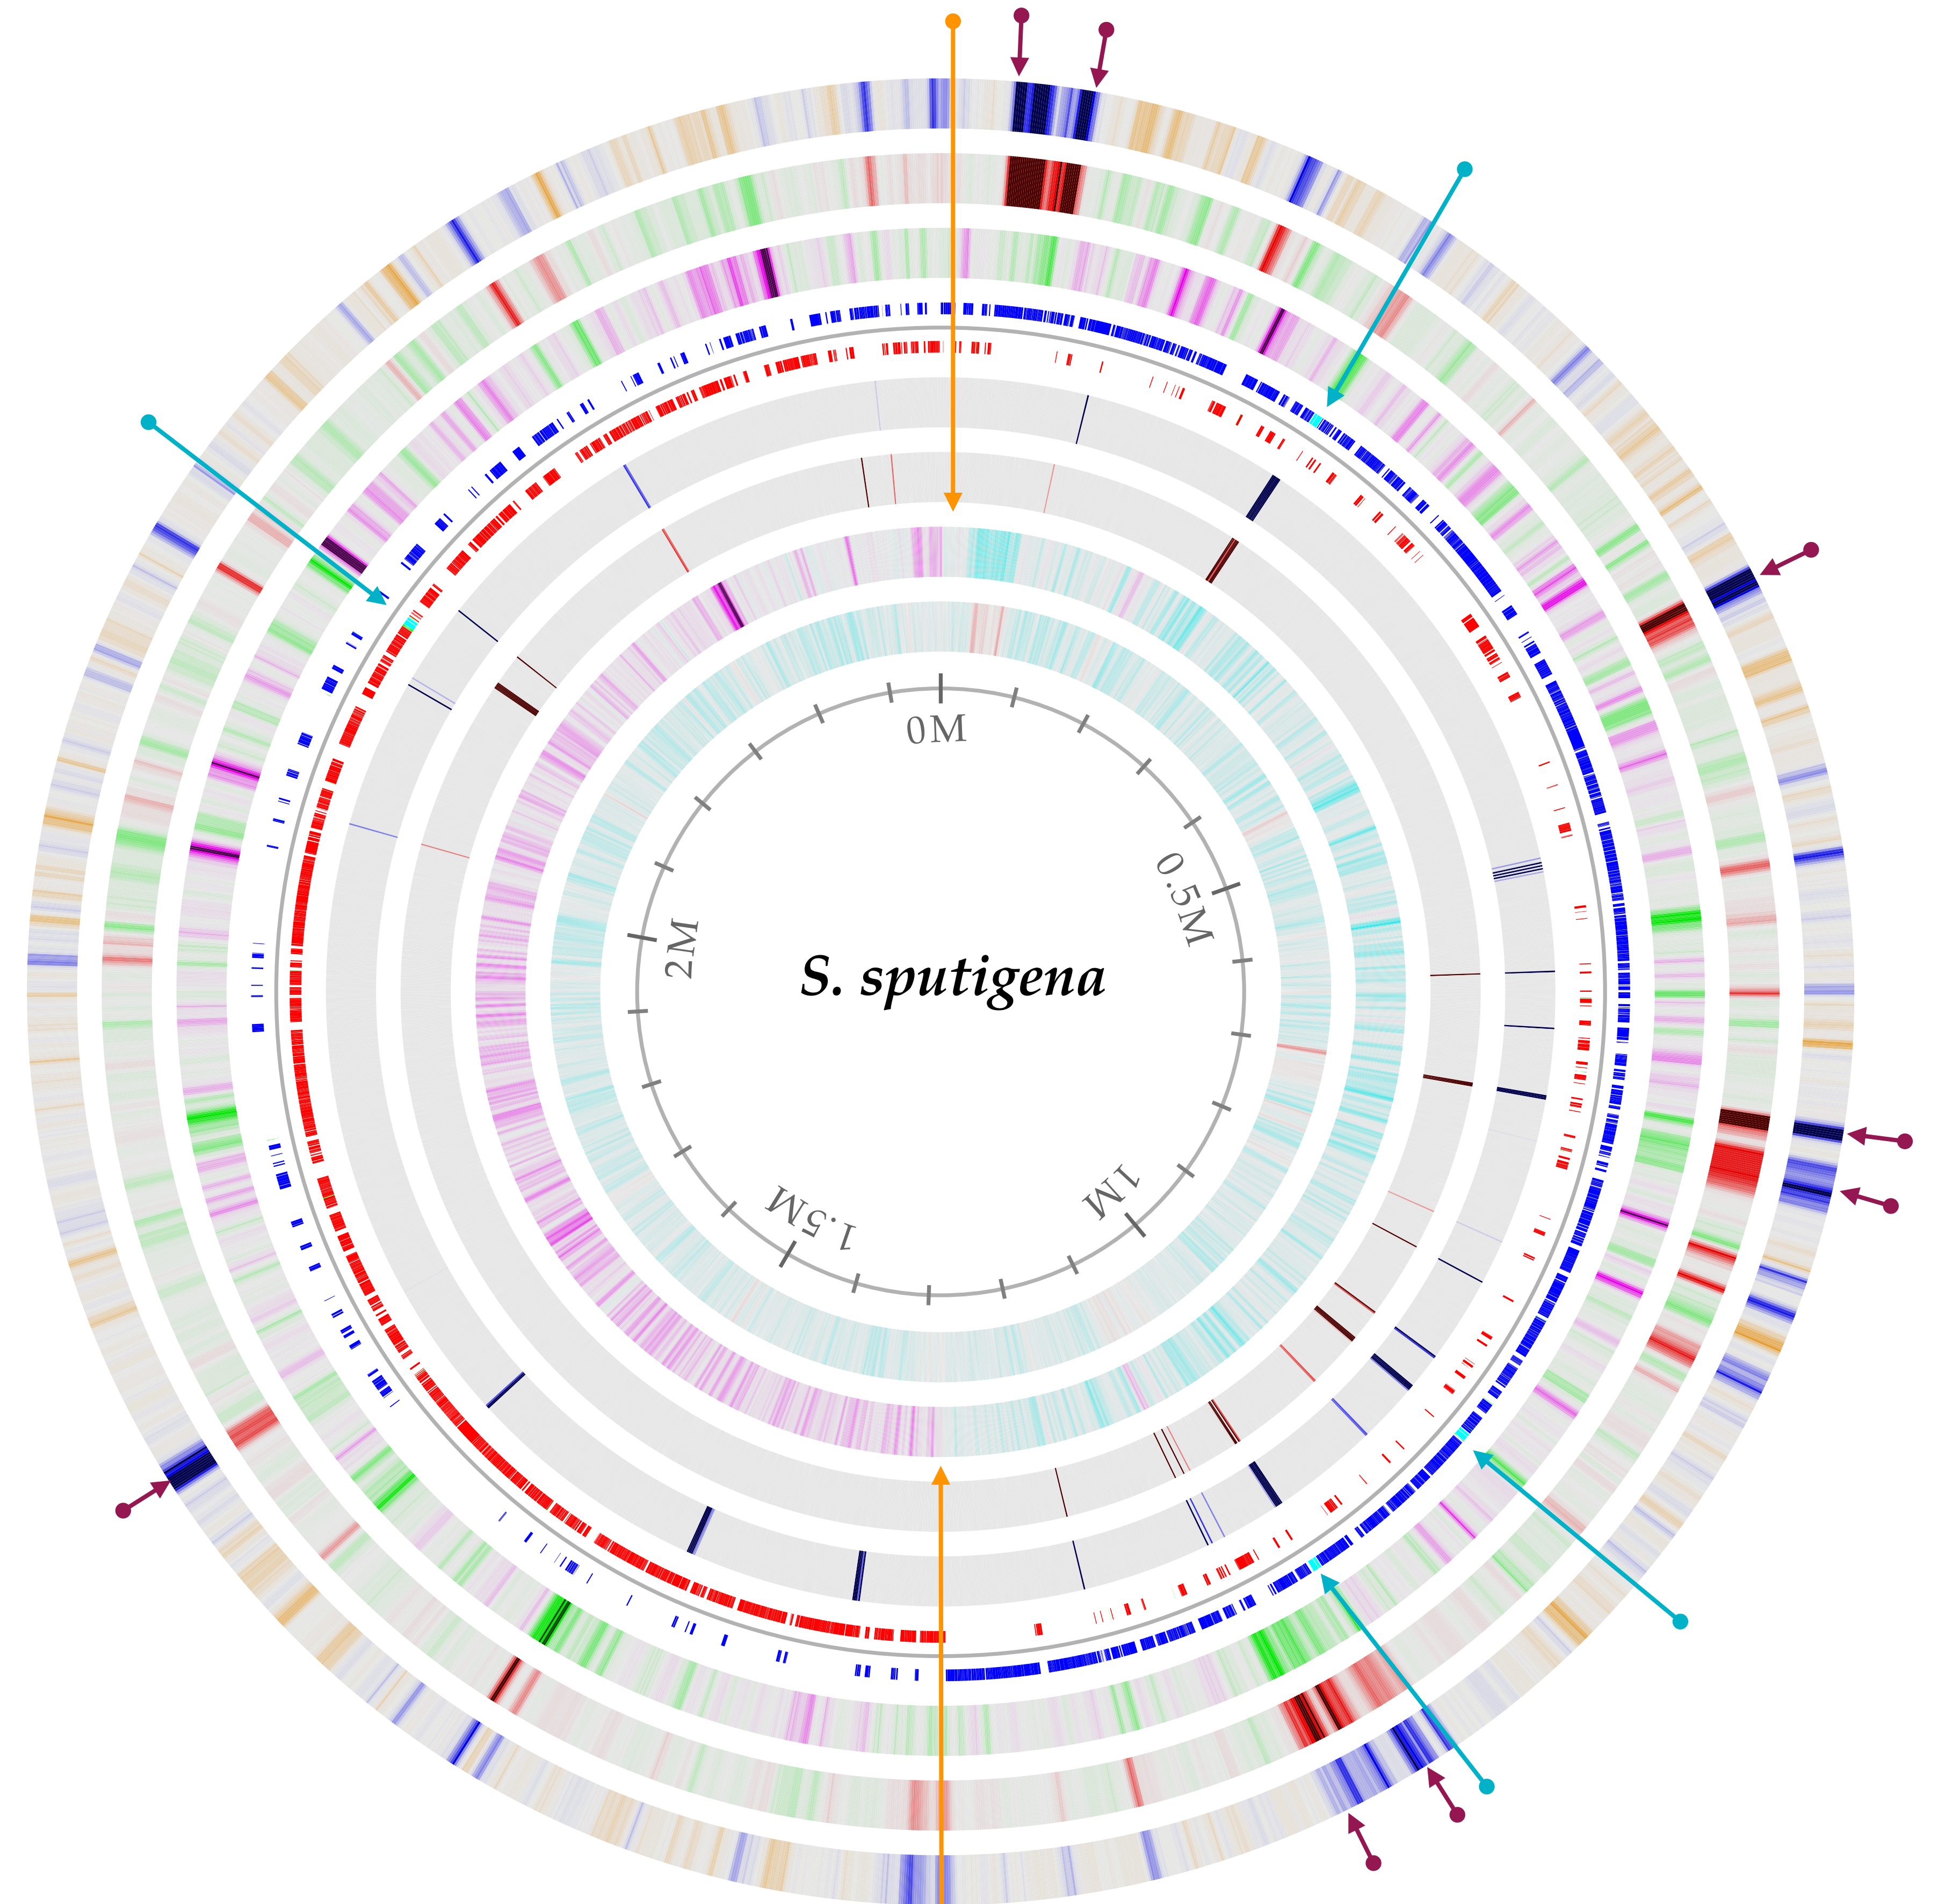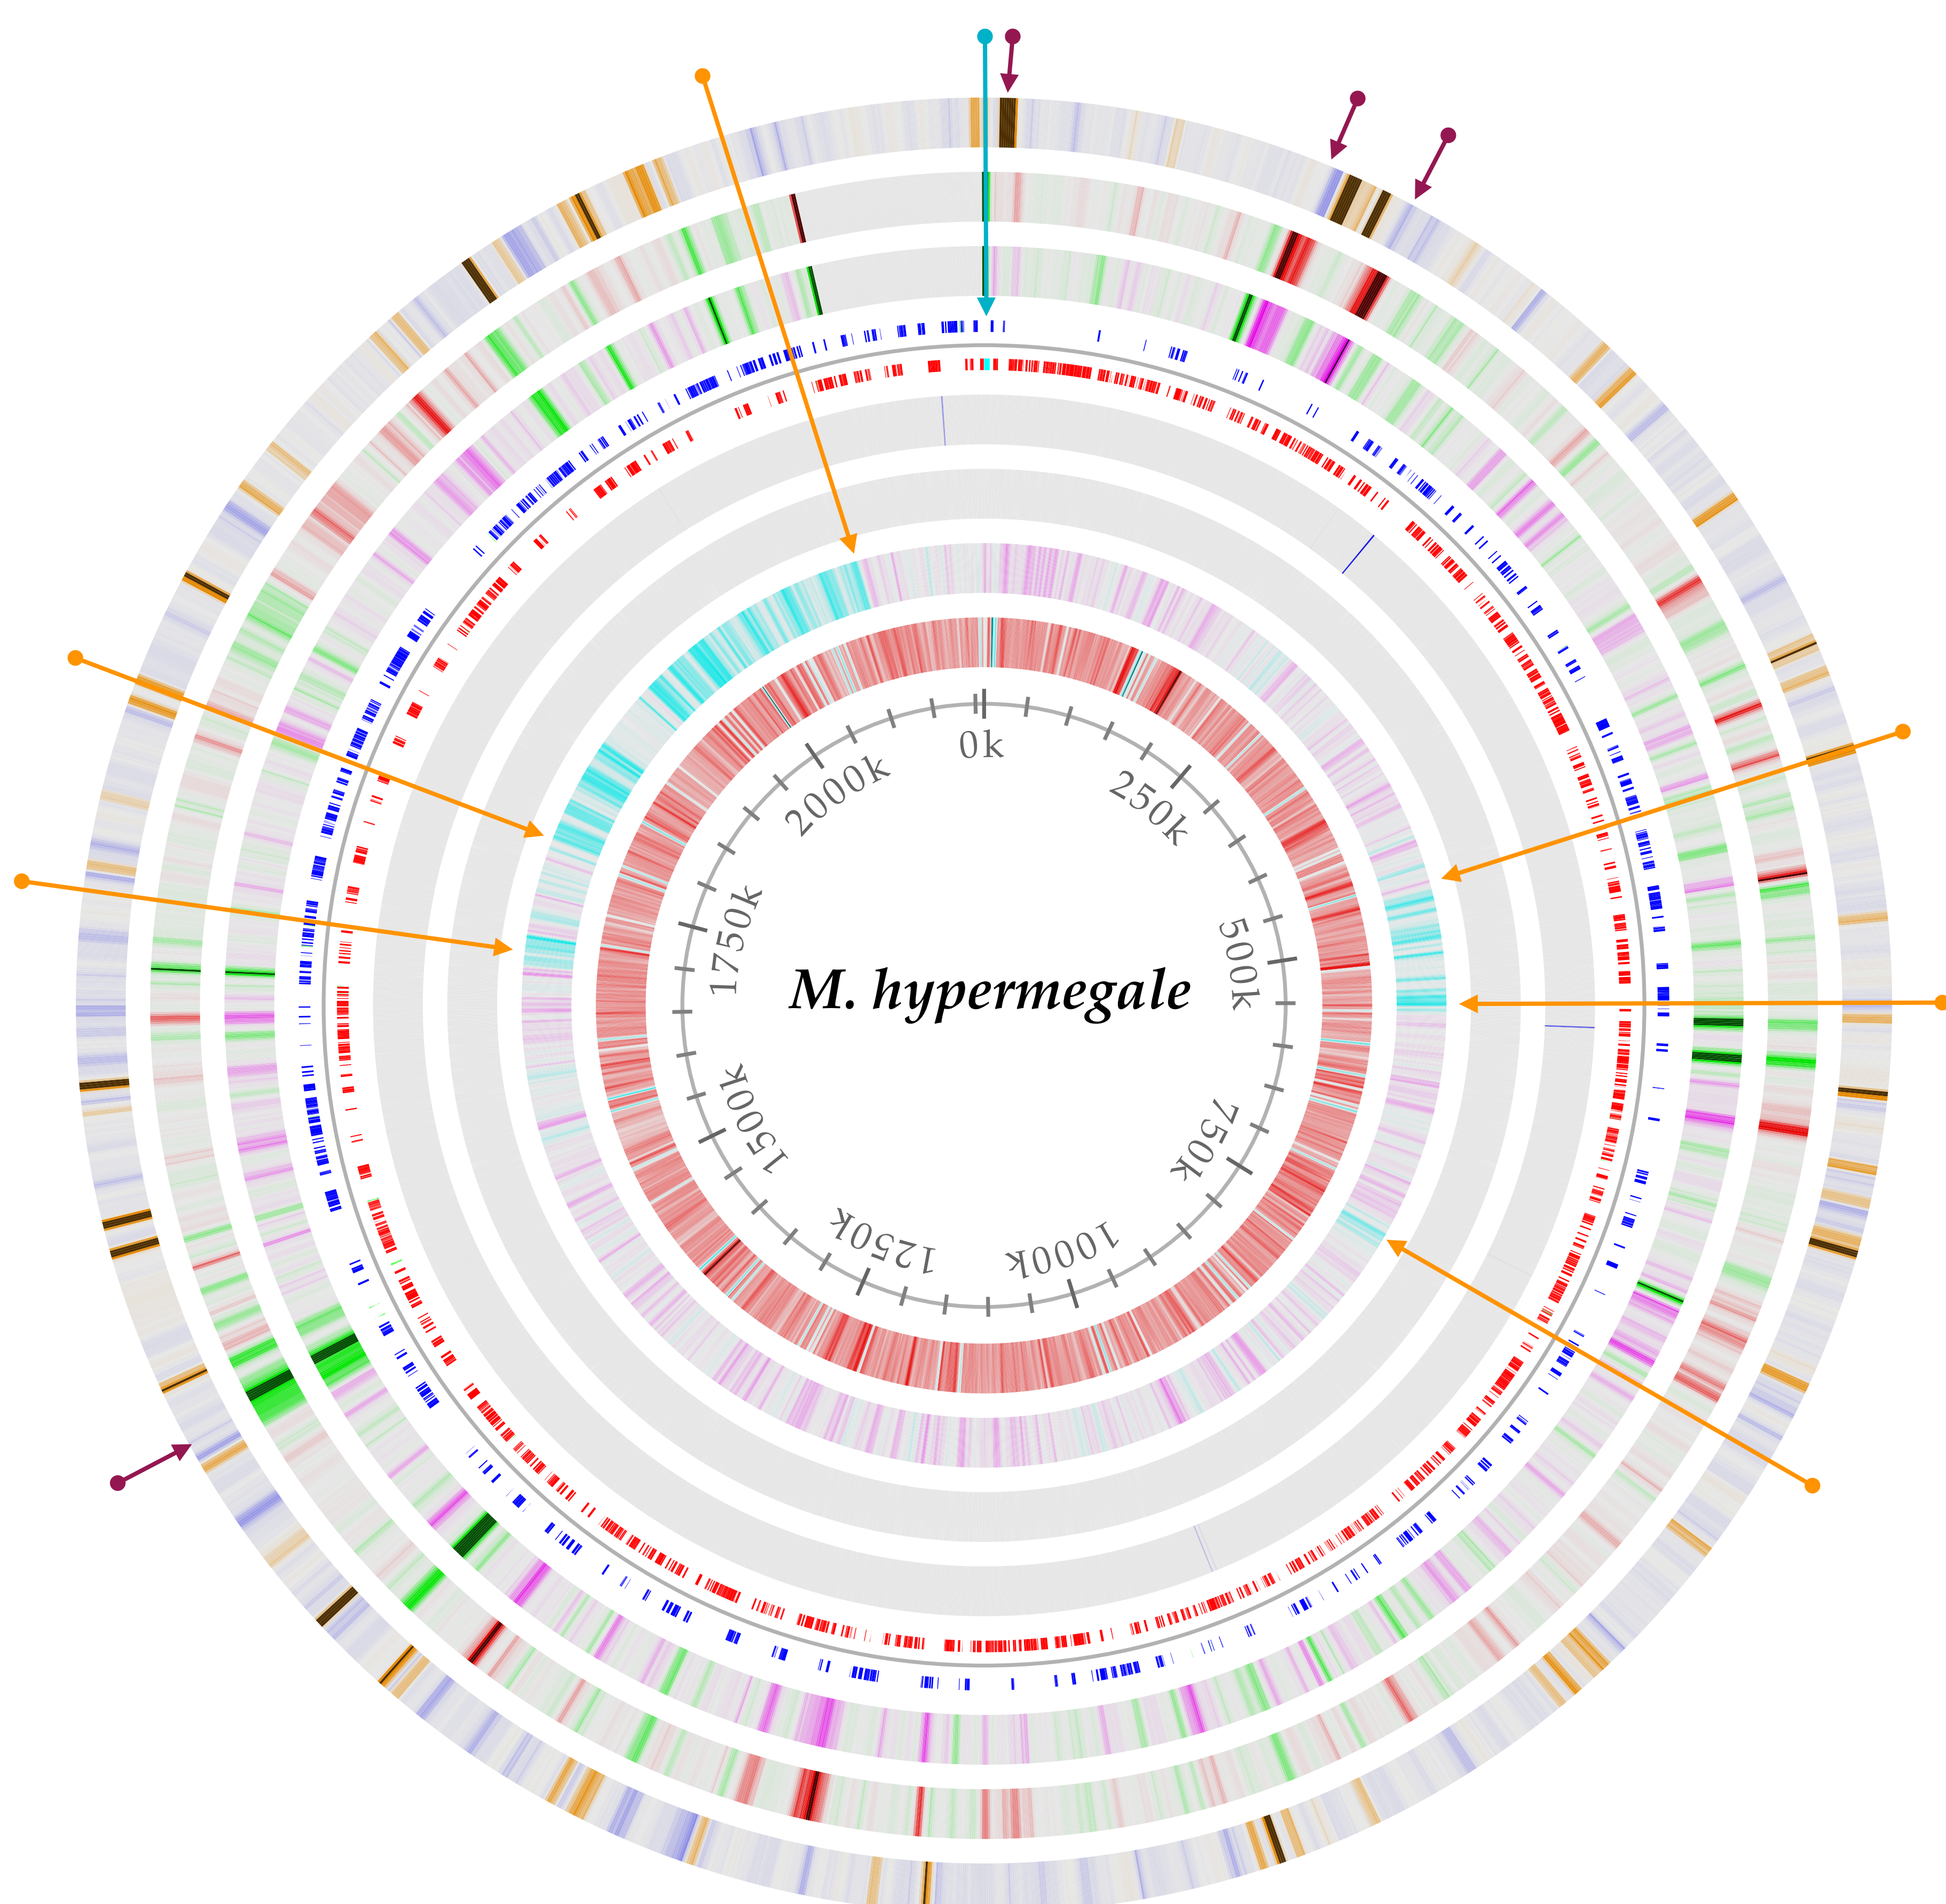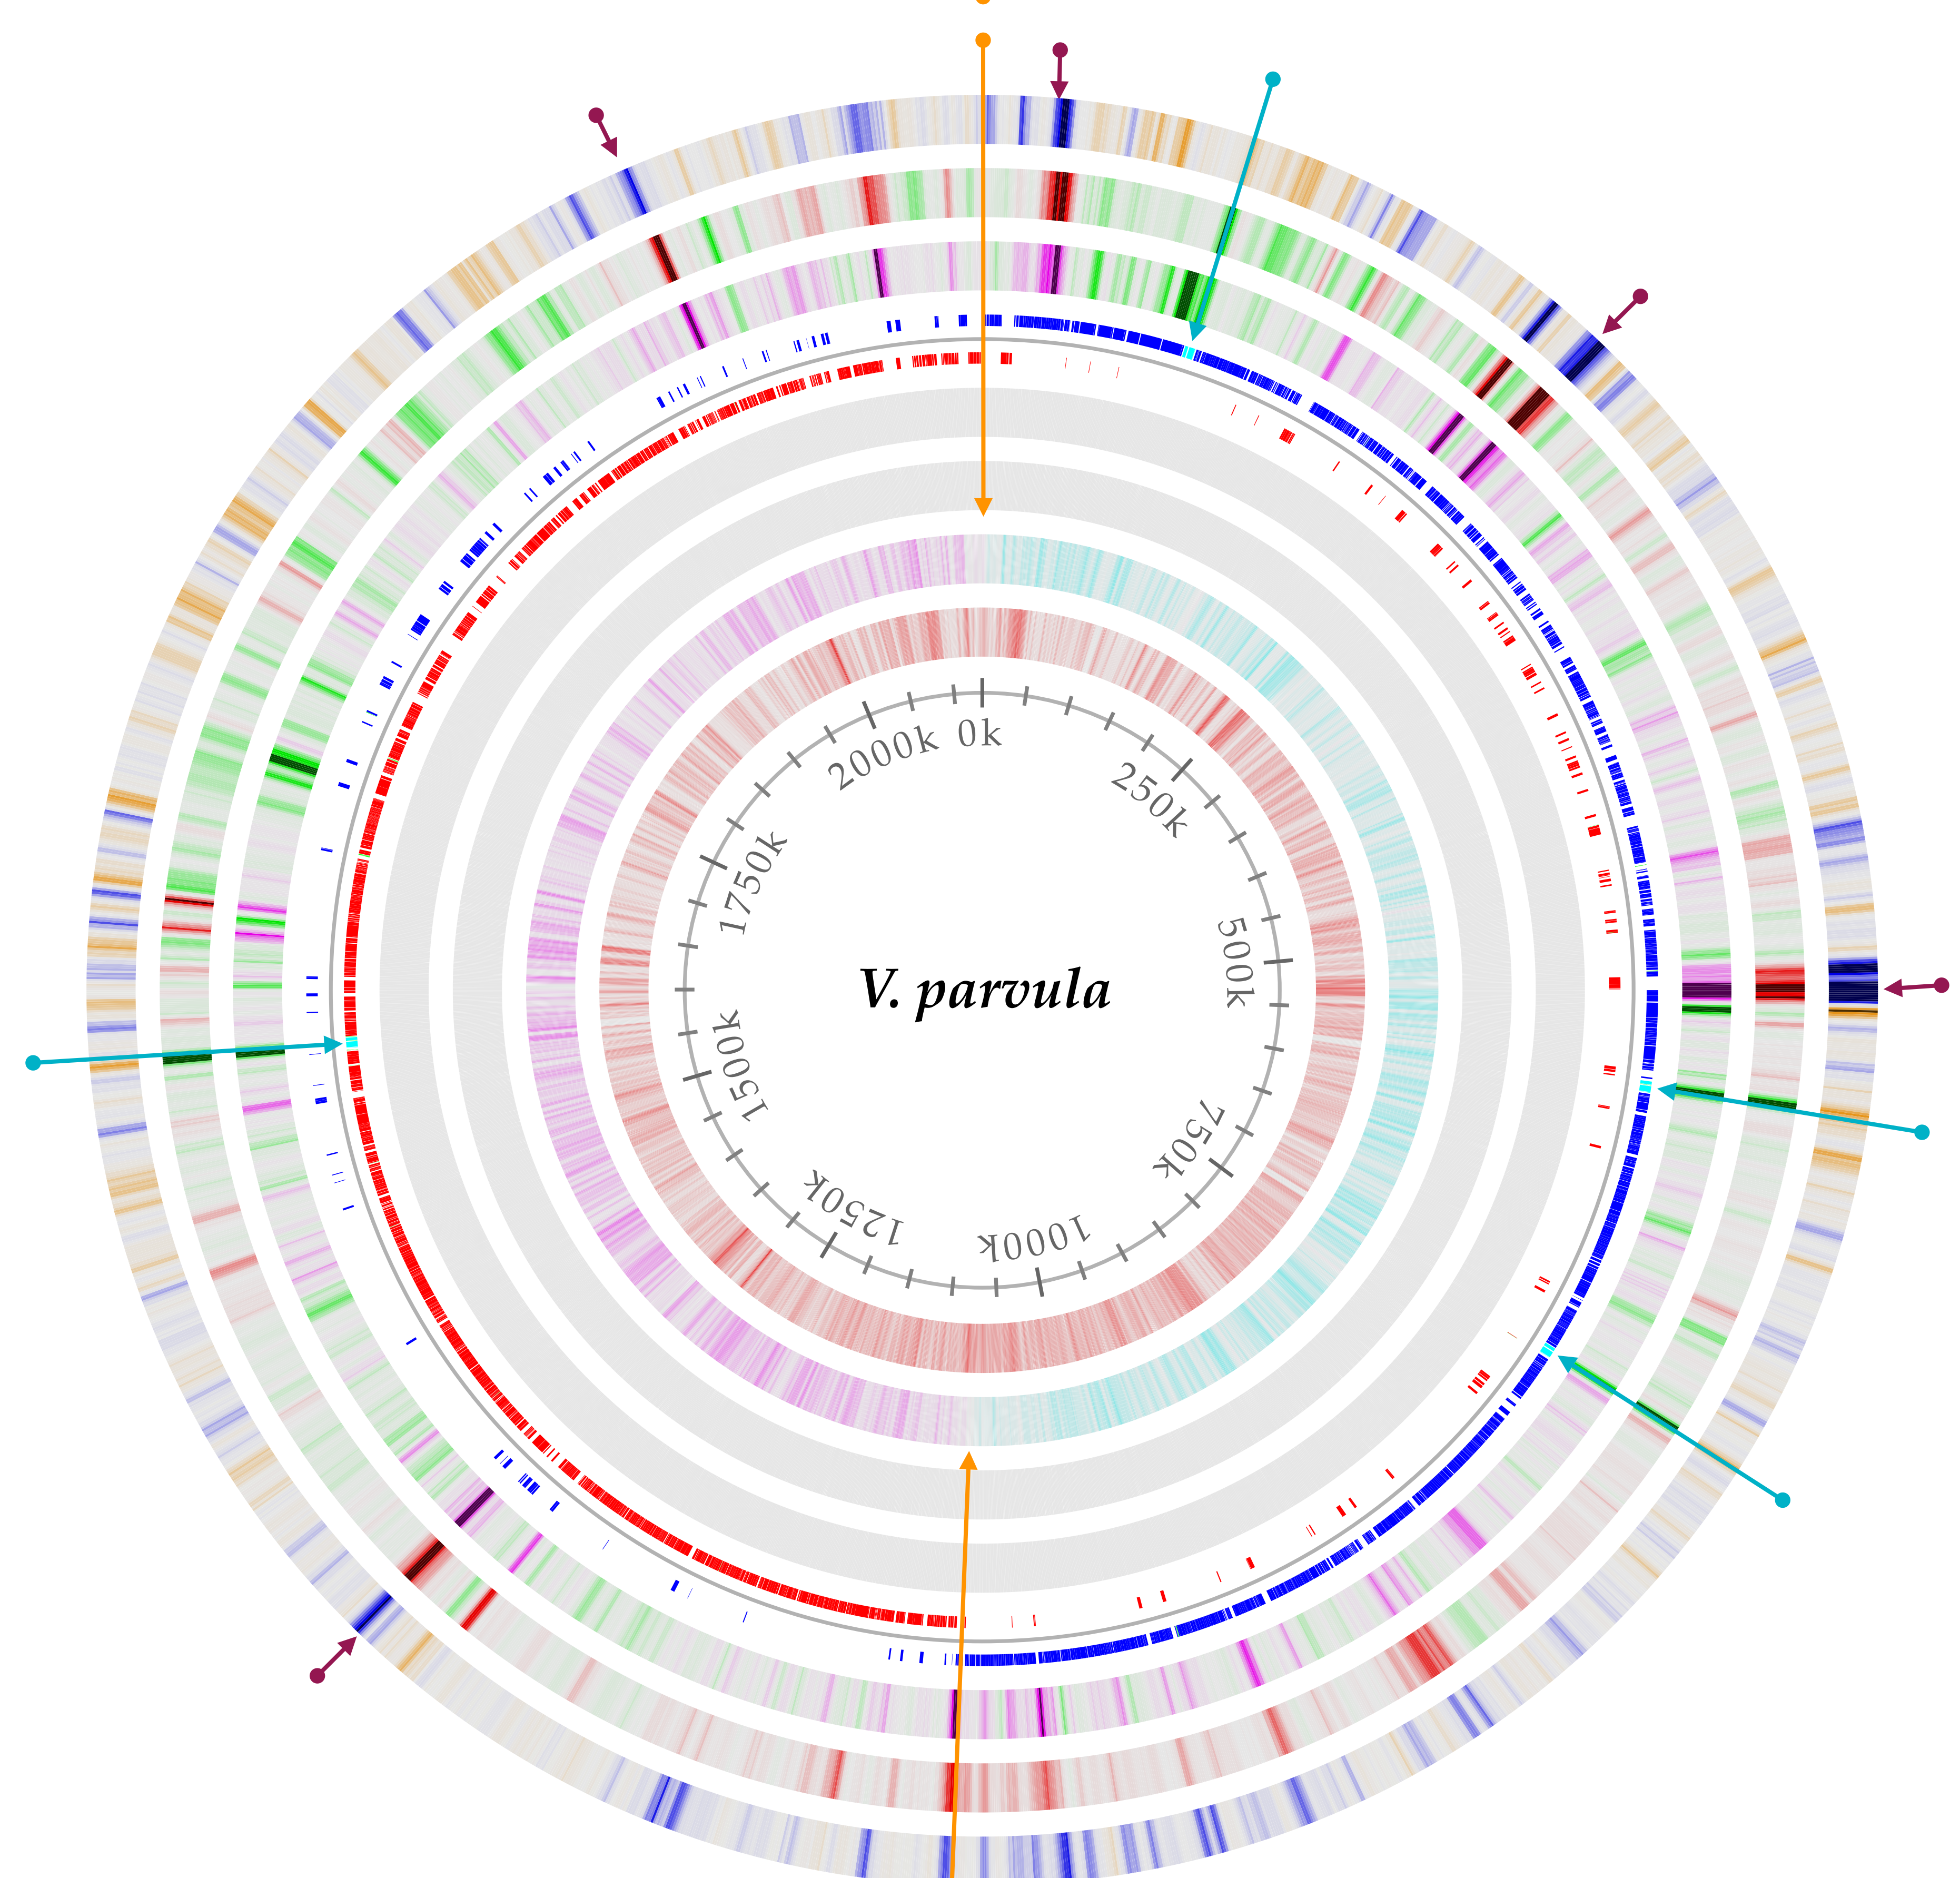

Supplement: pone.0060120.s001.pdf [file pone.0060120.s001.pdf]
